# Supplementary material for: Entropy-Aware Time-Varying Graph Neural Networks with Generalized Temporal Hawkes Process: Dynamic Link Prediction in the Presence of Node Addition and Deletion
Source: MDPI journal article supplement (doi:10.3390/make5040069), 2023-10-04
Supplement: s1 [file s1]

Archive with 1 entries (1 files):
- make-2524463-supplementary.pdf
